1 **Estimating effects of intervention measures on COVID-19 outbreak in Wuhan taking**  
2 **account of improving diagnostic capabilities using a modelling approach**

3 Jingbo Liang<sup>1</sup>, Hsiang-Yu Yuan<sup>1\*</sup>, Lindsey Wu<sup>2</sup>, Dirk U. Pfeiffer<sup>3</sup>

4

5 <sup>1</sup>Department of Biomedical Sciences, Jockey Club College of Veterinary Medicine and Life  
6 Sciences, City University of Hong Kong, Hong Kong

7 <sup>2</sup>Department of Infection Biology, Faculty of Infectious and Tropical Diseases, London School  
8 of Hygiene & Tropical Medicine, United Kingdom

9 <sup>3</sup>Centre for Applied One Health Research and Policy Advice, City University of Hong Kong,  
10 Hong Kong, China

11

12 \*Correspondence to: Hsiang-Yu Yuan [sean.yuan@cityu.edu.hk](mailto:sean.yuan@cityu.edu.hk)

## 13 **Abstract**

14 Background: Although by late February 2020 the COVID-19 epidemic was effectively controlled  
15 in Wuhan, China, the virus has since spread around the world and been declared a pandemic on  
16 March 11. Estimating the effects of interventions, such as transportation restrictions and quarantine  
17 measures, on the early COVID-19 transmission dynamics in Wuhan is critical for guiding future  
18 virus containment strategies. Since the exact number of COVID-19 infected cases is unknown, the  
19 number of documented cases was used by many disease transmission models to infer  
20 epidemiological parameters. However, this means that it would not be possible to adequately  
21 estimate epidemiological parameters and the effects of intervention measures, because the  
22 percentage of all infected cases that were documented changed during the first 2 months of the  
23 epidemic as a consequence of a gradually increasing diagnostic capability.

24 Methods: To overcome the limitations, we constructed a stochastic susceptible-exposed-infected-  
25 quarantined-recovered (SEIQR) model, accounting for intervention measures and temporal  
26 changes in the proportion of new documented infections out of total new infections, to characterize  
27 the transmission dynamics of COVID-19 in Wuhan across different stages of the outbreak. Pre-  
28 symptomatic transmission was taken into account in our model, and all epidemiological parameters  
29 were estimated using Particle Markov-chain Monte Carlo (PMCMC) method.

30 Results: Our model captured the local Wuhan epidemic pattern as a two-peak transmission  
31 dynamics, with one peak on February 4 and the other on February 12, 2020. The impact of  
32 intervention measures determined the timing of the first peak, leading to an 86% drop in the  $R_e$   
33 from 3.23 (95% CI, 2.22 to 4.20) to 0.45 (95% CI, 0.20 to 0.69). An improved diagnostic capability  
34 led to the second peak and a higher proportion of documented infections. Our estimated proportion

35 of new documented infections out of the total new infections increased from 11% (95% CI 1% -  
36 43%) to 28% (95% CI 4% - 62%) after January 26 when more detection kits were released. After  
37 the introduction of a new diagnostic criterion (case definition) on February 12, a higher proportion  
38 of daily infected cases were documented (49% (95% CI 7% - 79%)).

## 39 **Introduction**

40 Coronavirus disease 2019 (COVID-19), an acute respiratory infection originally identified in the  
41 city of Wuhan in Hubei Province, China, has spread worldwide in 2020<sup>1,2</sup>. Estimating the effects  
42 of intervention measures is still one of the major scientific goals in order to identify proper  
43 prevention measures in the world<sup>3</sup>. The precise estimation of transmissibility  $R_e$  is critical for the  
44 identification of appropriate intervention measures to contain the outbreak<sup>1,4,5,6,7,8</sup>. Although many  
45 recent studies have evaluated how intervention measures implemented in Wuhan reduced disease  
46 spreading to regions outside Wuhan<sup>6,9,10,11,12</sup>, the investigation of the contribution of interventions  
47 within Wuhan, the epidemic source region itself, has not been done much<sup>13,14</sup>, possibly because  
48 that an irregular pattern of transmission dynamics during early February hinders the model fitting  
49 processes, making the precise estimation of the parameters difficult.

50 To control the virus spreading during the early outbreak stage, the Chinese government  
51 implemented strict travel restrictions on January 23, 2020 in Wuhan<sup>15</sup>. The first epidemic peak  
52 occurred twelve days after the restrictions were implemented. Soon afterwards, the number of new  
53 daily documented cases started to fluctuate for about two weeks around this peak value, with  
54 another extremely high number of cases peaked in the middle, and then finally reduced (Figure  
55 S1). The transmission dynamics with such an irregular and unusual pattern can affect the  
56 estimation of the effects of intervention measures. The high number of documented cases after the

57 introduction of interventions was generally hypothesized to be mainly caused by improved  
58 diagnostic capability<sup>16</sup>, leading to more detected cases rather than caused by the intrinsic growth  
59 of the epidemic. However, most studies have not considered the changes in diagnostic capability  
60 over time, which can affect the number of documented infections and, ultimately, the estimation  
61 of  $R_e$ .

62 Accounting for temporal changes in COVID-19 diagnostic capability is critical for characterizing  
63 transmissibility and understanding the pattern of the local Wuhan epidemic. Recent studies have  
64 shown that the total potential case number has been significantly underestimated, with more than  
65 80% of all infections undocumented during the initial period following the identification of SARS-  
66 CoV-2 as the causative agent<sup>17</sup>. While the number of total new infections is driven by the epidemic  
67 growth, after the introduction of new commercial kits<sup>18</sup> and introduction of more sensitive  
68 diagnostic criteria<sup>16</sup> (Figure 1), diagnostic capacity in Wuhan increased, resulting in a higher  
69 proportion of total new infections been documented. Therefore, it is important to consider the  
70 improvements in diagnostic capacity over time when using the documented data to reconstruct  
71 transmission models for COVID-19 in Wuhan.

72 A particularly important challenge is to understand the proportion of transmission that occurs prior  
73 to the onset of illness. During the early outbreak, several studies have described the pre-  
74 symptomatic transmission of SARS-CoV-2, including a 20-year-old woman from Wuhan believed  
75 to have passed on the infection to five of her family members<sup>19</sup> and a Chinese individual believed  
76 to have infected her German business partner<sup>20</sup>, both in the absence of symptoms. The existence  
77 of pre-symptomatic transmission indicates that COVID-19 infected individuals can be infectious  
78 during the incubation period. However, simple classical susceptible-exposed-infected-recovered

79 (SEIR) models assume weak or no infectiousness during the incubation period<sup>21 14 22</sup>, potentially  
80 resulting in an underestimation of overall the infectiousness of COVID-19 cases.

81 In this study, in order to overcome the difficulties related to describing irregular fluctuations in the  
82 transmission dynamics and the limitation of the simple SEIR model, a stochastic susceptible-  
83 exposed-infected-quarantined-recovered (SEIQR) model was developed to describe the Wuhan  
84 COVID-19 transmission pattern after the initial outbreak stage. This model extends the classic  
85 SEIR model by including pre-symptomatic transmission and quarantined status and allows the  
86 effects of transportation restrictions and quarantine measures on virus transmission patterns to be  
87 estimated while accounting for improvements in the diagnostic capacity over time. After  
88 considering varying diagnostic capabilities, we will show that this model can capture the  
89 transmission dynamics well and can estimate the reduction in  $R_e$  precisely.

## 90 **Methods**

91 **Data collection.** The daily number of new documented COVID-19 cases from January 11 to  
92 March 10 in Wuhan, Hubei province, China, were collected from the Wuhan Municipal Health  
93 Commission<sup>23</sup> and the National Health Commission of the People's Republic of China<sup>24</sup>.

94 **Description of the SEIQR epidemic model.** An SEIQR model was developed to estimate the  
95 effect of intervention measures on COVID-19 transmission dynamics in the Wuhan population  
96 (Figure 2). In our model, S, E, I, Q and R represent the number of individuals in susceptible,  
97 exposed, symptomatically infectious, quarantined, and recovered statuses, with the total  
98 population size  $N = S + E + I + Q + R$  assumed to be 11 million. Here, we defined susceptible  
99 individuals change to exposed individuals after they have had contact with the virus and become  
100 infected but not yet symptomatic. Exposed individuals were further divided into two groups: E1,

101 exposed individuals at the latent period who are not able to transmit the disease; E2, exposed  
102 individuals not at the latent period who are at a pre-symptomatic stage (referred to pre-  
103 symptomatically infectious individuals). The proportions of E1 and E2 out of total exposed  
104 individuals were determined using the proportion of the time span of latent period and pre-  
105 symptomatic transmission period within the incubation period. In our model, we assumed that all  
106 exposed individuals become symptomatic cases after incubation period, and both pre-  
107 symptomatically and symptomatically infectious individuals can transmit the disease (Equation 2).  
108 For quarantined status, we assumed that only symptomatically infectious individuals can be  
109 quarantined. The SEIQR equations were derived as follows:

$$S_t = S_{t-1} - \Delta_{E,t}$$

$$E_t = E_{t-1} + \Delta_{E,t} - \Delta_{I,t}$$

$$I_t = I_{t-1} + \Delta_{I,t} - \Delta_{R,t} - \Delta_{Q,t} \tag{1}$$

$$Q_t = Q_{t-1} + \Delta_{Q,t}$$

$$R_t = R_{t-1} + \Delta_{R,t}$$

110  $\Delta_{E,t}$  is defined as the number of newly exposed individuals before symptom onset, during a time  
111 interval from  $t$  to  $t + 1$ ,  $\Delta_{I,t}$  is the number of newly symptomatically infectious cases (new-onset  
112 cases),  $\Delta_{Q,t}$  is the number of newly quarantined cases, and  $\Delta_{R,t}$  is the number of newly recovered  
113 individuals. We assumed  $\Delta_{E,t}$ ,  $\Delta_{I,t}$ ,  $\Delta_{Q,t}$ , and  $\Delta_{R,t}$  follow Poisson distributions:

$$\Delta_{E,t} \sim \text{Poisson} \left( \frac{\beta_{t-1} [E_{2,t} + I_{t-1}] S_{t-1}}{N} \right)$$

$$\Delta_{I,t} \sim \text{Poisson}(\sigma \times E_{t-1})$$

(2)

$$\Delta_{Q,t} \sim \text{Poisson}(q \times I_{t-1})$$

$$\Delta_{R,t} \sim \text{Poisson}(\gamma \times I_{t-1})$$

114 where  $E_{2,t}$  is the number of pre-symptomatically infectious individuals (E2) at time  $t$ , assumed  
 115 determined as  $E_{2,t} = \left( \frac{\frac{1}{\sigma} - \eta}{\frac{1}{\sigma}} \right) E_{t-1}$ ,  $\sigma$  is the rate at which exposed individuals become  
 116 symptomatically infectious cases ( $1/\sigma$  is the incubation period),  $\eta$  is the latent period,  $q$  is the  
 117 quarantine rate ( $1/q$  the time between symptom onset and quarantine start),  $\gamma$  is the recovery rate,  
 118 expressed by  $\gamma = 1/(\tau - 1/\sigma)$ , and  $\tau$  is the generation time. Here we assumed  $\tau$  was fixed  
 119 to be 10 days considering the period from being infected to recovered was generally longer than  
 120 the observed serial interval (e.g. 7.5 days)<sup>1</sup> and the infectious period was estimated to be around  
 121 10 days by a virology study<sup>25</sup>. Using a constant value of  $\tau$  can reduce the model uncertainty.  $\beta_t$   
 122 is the transmission rate on day  $t$ . In this model,  $\beta_t$  is assumed to be modulated by the Wuhan  
 123 transportation restriction policy, represented as an exponential relationship with a lag effect:

$$\beta_{t+\text{lag1}} = e^{(\alpha \times \text{pol}_t + \log(\beta_0))} \quad (3)$$

124 where  $\text{pol}_t$  is an indicator variable for the daily transportation restriction policy, with  $\text{pol}_t = 0$  if  
 125 there is no transportation restriction at time  $t$  (i.e., before January 23)<sup>15</sup> and  $\text{pol}_t = 1$  otherwise.  $\alpha$   
 126 is the transportation restriction effect coefficient,  $\beta_0$  is the basic transmission rate without  
 127 transportation restrictions, and  $\text{lag1}$  indicates the lag time of the transportation restrictions effect

128 on the virus transmission rate assumed to be 6 days<sup>13</sup>. Thus,  $\beta_t$  has a constant value throughout the  
129 period before the implementation of transportation restriction and change to a different constant  
130 value after then.

131 **Mapping SEIQR model to observed hospital document cases.** Model estimates of new-onset  
132 cases ( $\Delta_{I,t}$ ) can not be compared with observed hospital documented cases directly. This is because  
133 documented data only captures COVID-19 cases who seek hospital care and are successfully  
134 diagnosed, which will only be a proportion of the total number of symptomatically infectious cases  
135 in the population estimated in the model. To address this discordance, we introduced an  
136 observation model to link the SEIQR model simulated symptomatically infectious cases to the  
137 observations. The daily number of hospital documented cases,  $(\text{hosp\_document})_{t+\text{lag}2}$ , was  
138 assumed followed a normal distribution with the mean defined as the number of newly  
139 symptomatically infectious cases  $\Delta_{I,t}$  that were reported (documented) with the delay  $\text{lag}2$  of 6  
140 days<sup>13</sup>:

$$(\text{hosp\_document})_{t+\text{lag}2} \sim \text{Normal}(\Delta_{I,t} \times p(m|i) \times p(\text{hosp\_diag}|m)_{t+\text{lag}2}, \epsilon^2) \quad (4)$$

141 where  $p(m|i)$ , the probability of a symptomatically infectious case seeks medical care, was  
142 assumed to be fixed at 0.8 according to the high motivation of care-seeking behavior in Wuhan<sup>26</sup>.  
143 Hospital diagnostic rate,  $p(\text{hosp\_diag}|m)_{t+\text{lag}2}$ , represents the probability that an infected  
144 outpatient is diagnosed as COVID-19 case by the hospital with the delay of  $\text{lag}2$ .  $\epsilon^2$  is the  
145 distribution variance assumed to be 360000. We also defined  $(\text{prop\_doc})_t$ , the proportion of  
146 documented cases out of total newly symptomatically infectious cases, could be calculated as  
147  $(\text{prop\_doc})_t = p(m|i) \times p(\text{hosp\_diag}|m)_t$ .



148 Given that the diagnostic capability progressed over time, hospital diagnostic rate  
149  $p(\text{hosp\_diag|m})_t$  was assumed to have three different values during each of the three periods:  
150  $p_1(\text{hosp\_diag|m})$  is the rate for the period prior to January 27 when test kits were limited,  
151  $p_2(\text{hosp\_diag|m})$  is the rate for the period between January 27 and February 11 when test kits  
152 were sufficient but diagnostic criteria was biased without incorporating clinical diagnosis<sup>7</sup>, and  
153  $p_3(\text{hosp\_diag|m})$  is the rate for the period after February 12 when test kits were sufficient and  
154 diagnostic criteria became more sensitive based on both clinical diagnosis and laboratory  
155 diagnosis<sup>16</sup>. The values of  $p_1(\text{hosp\_diag|m})$ ,  $p_2(\text{hosp\_diag|m})$  and  $p_3(\text{hosp\_diag|m})$  were  
156 estimated after fitting the model to the number of daily hospital documented cases. Hospital  
157 documented cases on the specific days of January 27, February 12, and February 13, the dates of  
158 change in testing capacity<sup>7 16</sup>(Figure S1), are likely to contain retrospectively documented cases  
159 due to the transition to new diagnostic criteria or test kits<sup>27</sup>. Therefore, we removed the original  
160 values of these three data and re-filled them by using “na.spline” function in R. That is, the  
161 smoothed values of these three dates and the original data of other dates were used during the  
162 model fitting process.

163 **Effective reproductive number  $R_e$ .** After obtaining the posterior distributions of model  
164 parameters  $\beta_t, \sigma, q, \gamma$  and model status  $S_t$ , the effective reproductive number  $R_e(t)$  before and after  
165 the intervention policy was implemented can be calculated using the next-generation matrix  
166 approach. Following methods previously described by Diekmann et al.<sup>28</sup>, the transmission matrices  
167  $T$  and  $\Sigma$  can be calculated. Briefly, each element in  $T$  represents the average number of newly  
168 infected cases in the exposed compartment (E) per unit time due to transmission via a single  
169 infected individual in the exposed (E) or infectious group (I), calculated as  $\beta_t \left[ \left( \frac{\frac{1}{\sigma} - \eta}{\frac{1}{\sigma}} \right) \right] S_t$  or  $\beta_t S_t$ .

170  $\Sigma$  represents the transitions between model states.  $R_e(t)$  can be calculated as the first eigenvector  
 171 using the following formula:

$$172 \quad R_e(t) = \text{eig} \left( (-1) \begin{bmatrix} \beta_t \left[ \frac{1}{\sigma} - \eta \right] S_t & \beta_t S_t \\ \frac{1}{N} & \frac{\beta_t S_t}{N} \end{bmatrix} \begin{bmatrix} -\sigma & 0 \\ \sigma & -(\gamma + q) \end{bmatrix}^{-1} \right) [1] \quad (6)$$

173 where  $\beta_t, S_t, \sigma, q, \gamma$ , and  $N$  are defined as described above.

174 **Model-filters and validations.** Since the time-varied true number of individuals in S, E, I, Q and  
 175 R statuses were not directly observable, we used Particle Markov-chain Monte Carlo (PMCMC)  
 176 method to handle such hidden variables by simultaneously estimating both the parameters and the  
 177 hidden variables<sup>29</sup>. Our framework of PMCMC contains two parts: the SEIQR transmission model  
 178 that generates the transmission dynamics and the observation model that maps SEIQR model to  
 179 observed hospital document cases. All posterior distributions for the epidemiological hidden  
 180 variables and parameters were obtained using the PMCMC method, implemented in the Nimble R  
 181 library<sup>30</sup>.

182 The priors for the parameters were drawn from the following distributions: for the incubation  
 183 period,  $1/\sigma \sim U(1,10)$ ; for the latent period,  $\eta \sim U(1,7)$ ;  $1/q \sim U(1,10)$ , for the time between  
 184 symptom onset and quarantine start;  $\beta_0 \sim U(0,1)$  for the basic transmission rate; and  $\alpha \sim N(0,1)$ ,  
 185 for transportation control coefficient. In the observation model, the priors for time progressed  
 186 hospital diagnostic rates were set as uniform distribution:  $p_1(\text{hosp\_diag}|m) /$   
 187  $p_2(\text{hosp\_diag}|m) \sim U(0,1)$  ,  $p_2(\text{hosp\_diag}|m) / p_3(\text{hosp\_diag}|m) \sim U(0,1)$  ,  
 188  $p_3(\text{hosp\_diag}|m) \sim U(0,1)$ .

189 To assess convergence, three independent chains of the SMC algorithm sets were conducted using  
190 100,000 iterations of 1000 particle samples in each chain. We calculated the effective sample size  
191 (ESS) and Gelman-Rubin convergence diagnostic statistics across the three chains.

## 192 **Results**

193 **Reconstructing disease dynamics.** The daily number of documented COVID-19 cases in Wuhan,  
194 increased exponentially up until the first epidemic peak occurring on February 4, and started to  
195 fluctuate around the first peak value for about two weeks. Note that the values of the highest peak  
196 occurring around the end of the second week in two consecutive days in February were ignored in  
197 our study because this peak was primarily caused by the retrospectively documented cases under  
198 new diagnostic criteria, whose actual hospitalization date were diversely distributed and can not  
199 be traced by our model (Figure S1). The irregular fluctuations can be explained by the effects of  
200 interventions and the improved diagnostic capability: the interventions determined the timing of  
201 the first peak and may cause a decline pattern afterward; the improved diagnostic capability led to  
202 an increase in the number of the documented cases. Together, a high number of cases can be  
203 produced for about two weeks. Our stochastic SEIQR model reproduced this irregular pattern by  
204 a two-peak dynamic with the first peak occurring on February 4 and the second peak occurring  
205 shortly on February 12 (Figure 3). Our estimated times and intensities coincide with the observed  
206 epidemic pattern. The estimated incubation period was 5.68 days (95% CI 2.46 - 8.03), and the  
207 estimated latent time was 2.82 days (95% CI 1.10 - 5.40) (Table 1).

208 **Effects of intervention measures.** Both transportation restrictions and quarantine measures had  
209 significant impacts on the effective reproductive number  $R_e$ . The initial value of  $R_e$  was estimated  
210 to be 3.23 (95% CI 2.22 - 4.20) from January 5 to January 28 (Figure 4), but has dropped by 86%

211 to 0.45 (95% CI 0.20 - 0.69) from January 29 to March 4 after the implementation of transportation  
212 restrictions, calculated based on the estimated values of transmission rate  $\beta_t$  (Figure S2). The  
213 estimated time delay to start quarantine after symptom onset was 5.44 days (95% CI 1.99 - 9.76)  
214 (Table 1). For limiting the outbreak growth, quarantine measures were important but not essential.  
215 Without quarantine measures, the initial value of  $R_e$  would increase to 4.54 (95% CI 3.65 - 6.79)  
216 before the implementation of transportation restrictions, and would become 0.63 (95% CI 0.24 -  
217 1.79) after the implementation of the restrictions (Figure 4). Although  $R_e$  eventually became less  
218 than one, the high initial value of  $R_e$  would have caused a huge burden of the outbreak. We further  
219 tested how the improvements in the diagnostic capacity influenced the estimation of  $R_e$ : about  
220 12%-16% overestimation of  $R_e$  was found due to a fixed diagnostic capacity (Figure S3); and the  
221 model fitting RMSE (root-mean-square error) was increased to be 278.80, comparing to 243.37  
222 from our model, indicating a more accurate prediction was generated from our model taking  
223 account of improving diagnostic capabilities.

224 **Effects of detection capability.** During the epidemic, the detection capability of COVID-19 in  
225 Wuhan has been improved several times through the increased availability of test kits and the  
226 introduction of more sensitive diagnostic criteria (Figure 1). These improvements in the detection  
227 capability greatly affected the proportion of documented infections during three periods. From  
228 January 11 to January 26, the estimated proportion of documented new infections out of total new  
229 infections was 11% (95% CI 1% - 43%), increasing to 28% (95% CI 4% - 62%) following the  
230 increase in test kit production on January 26. Then the proportion further raised to 49% (95% CI  
231 7% - 79%) after February 12 when the diagnostic criteria became more sensitive (Figure 5A). The  
232 estimated potential cumulative number of infections is correlated with but higher than the observed

233 hospital documented cases in Wuhan, and a sudden surge of hospital documented cases on  
234 February 12 can be explained by the introduction of more sensitive diagnostic criteria (Figure 5B).

## 235 **Discussion**

236 This is the first study to demonstrate the effects of intervention measures on the transmission  
237 dynamics in Wuhan while taking account of improvements in diagnostic capacity over time. Our  
238 results indicated that the transportation restrictions and quarantine measures together in Wuhan  
239 were able to contain local epidemic growth by substantially reducing  $R_e$  by 86%. This proportion  
240 of the reduction in  $R_e$  was exactly the same as the proportion of the reduction in the average daily  
241 number of contacts per person (14.6 vs. 2.0) between a baseline period (before the outbreak) and  
242 the outbreak period in a recent study using contact surveys in Wuhan<sup>31</sup>. Since limited studies have  
243 estimated the effects of the transportation restrictions in Wuhan, the reduction of contact rate offers  
244 valuable information to project the possible effects on the reproduction number. Assuming the  
245 transmissibility was proportional to the contact numbers, the reduction ratio of the contact numbers  
246 will be proportional to the reduction ratio in  $R_e$ . These results confirm that measuring contact  
247 mixing is an accurate way to estimate the impacts of intervention measures. Furthermore, the  
248 proportion of undocumented infections was estimated to be reduced during the outbreak, as a  
249 consequence of the improvements in diagnostic capability. These findings will help to inform  
250 further analysis aimed at developing prevention strategies and evaluating the effects of public  
251 health interventions.

252 While most studies assumed a fixed proportion of documented infections over time, the study  
253 presented here estimates an initial proportion of documented infections of 11%, similar to previous  
254 predictions of 14% by Ruiyun et al<sup>17</sup>, which progressively increases with the improvement of

255 diagnostic capability. Our results suggest that the increase in the number of cases during the early  
256 outbreak needs to be interpreted cautiously, given that the proportion of documented infections is  
257 highly dependent on the availability and use of testing kits over time. As detection was enhanced  
258 through improved clinical diagnosis<sup>16</sup>, a sharp rise in cumulative cases on February 12 is likely  
259 explained by prior onset cases retrospectively documented under new diagnostic criteria. The  
260 undocumented infections may be of mild illness or insufficiently serious about seeking treatment<sup>17</sup>.  
261 Our results show that the estimated proportion of documented new infections out of total new  
262 infections increased to 49% after diagnostic sensitivity was increased.

263 The estimation of  $R_e$  in the study from January 5 to January 28 is consistent with other recent  
264 studies<sup>32</sup> (3.11 by Jonathan et al.<sup>5</sup>, 3.15 by Tian et al.<sup>21</sup>, 1.4 to 3.9 by Li et al.<sup>1</sup>). Furthermore, our  
265 results demonstrate that both transportation restrictions and quarantine measures were able to  
266 reduce COVID-19 transmission. Transportation restrictions, including stopping all forms of public  
267 transportation, including trains, and air travel, sharply reduced social contacts thereby reducing  
268 virus transmission rates<sup>13 17</sup>. Population behavioral responses (e.g., social distancing, contacts  
269 mixing, wearing facemasks, etc.) could change concurrently with the implementation of  
270 transportation measures<sup>33 31</sup>. Because a gradual increase in documented hospital cases in February  
271 can be partly due to the increased detection capability, the effects of intervention measures  
272 (indicated as the reduction in  $R_e$ ) was estimated to be larger than previously reported in studies  
273 using fixed detection rates over the course of the epidemic. For example,  $R_e$  was estimated to drop  
274 by 55.3% by Kucharski et al<sup>13</sup>. Quarantine of symptomatic infections was also found to be essential  
275 in curbing the epidemic. Our model estimated that the time between symptom onset and quarantine  
276 start was 5.44 days, similar to the estimates previously reported by Tian et al. (5.19 days)<sup>6</sup>.

277 The estimated incubation period was 5.68 days which is also consistent with other recent studies<sup>1</sup>  
278 <sup>21 34 35</sup>. As the estimated latent period is 2.82 days, some transmissions may occur before the  
279 symptom onset. Finding ways to reduce possible contact during the pre-symptomatic transmission  
280 period may be a critical component in containing the spread of the virus. Given the existence of  
281 pre-symptomatic transmission, this study aligns with government recommendations that people  
282 who have had close contact with confirmed cases, regardless of whether they show symptoms or  
283 not, need to be quarantined for 14 days<sup>36</sup>.

284 The current study suggests that although intensive transportation restrictions and quarantine  
285 measures were critical in containing the COVID-19 outbreak in Wuhan, the improvements in  
286 detection capability have to be taken into account in order to evaluate the effectiveness of these  
287 intervention measures more accurately. This will allow more meaningful evaluations of public  
288 health control effects which will be important for decision in relation to which intervention used  
289 in Wuhan should be replicated in other parts of the world in order to effectively control the current  
290 pandemic.

## 291 **Acknowledgments**

292 This study was supported by grants from the City University of Hong Kong (#7200573 and  
293 #9610416). We thank Dr. Chung Yin (Joey) Leung who has provided invaluable comments. We  
294 thank Prof. Mengsu Yang, Prof. Chih-Ching Huang and Prof. Si Zhao Qin at City University of  
295 Hong Kong for their suggestions and contributions in the preparation of the manuscript.

## 296 **Author contributions**

297 HY and JL designed the research. JL collected the data, carried out the analysis, wrote the first  
298 draft. HY, LW and DP critically revised the manuscript, and HY gave final approval for  
299 publication.

### 300 **Declaration of interests**

301 All authors declare no competing interests.

### 302 **Reference**

- 303 1. Li, Q. *et al.* Early Transmission Dynamics in Wuhan, China, of Novel Coronavirus–  
304 Infected Pneumonia. *N. Engl. J. Med.* (2020) doi:10.1056/nejmoa2001316.
- 305 2. Bedford, J. *et al.* COVID-19: towards controlling of a pandemic. *Lancet* **0**, (2020).
- 306 3. Cobey, S. Modeling infectious disease dynamics. *Science* (80-. ). eabb5659 (2020)  
307 doi:10.1126/science.abb5659.
- 308 4. Riou, J. & Althaus, C. L. Pattern of early human-to-human transmission of Wuhan 2019  
309 novel coronavirus (2019-nCoV), December 2019 to January 2020. *Eurosurveillance* **25**,  
310 2000058 (2020).
- 311 5. Read, J. M., Bridgen, J. R. E., Cummings, D. A. T., Ho, A. & Jewell, C. P. Novel  
312 coronavirus 2019-nCoV: early estimation of epidemiological parameters and epidemic  
313 predictions. *medRxiv* (2020) doi:10.1101/2020.01.23.20018549.
- 314 6. Tian, H. *et al.* An investigation of transmission control measures during the first 50 days  
315 of the COVID-19 epidemic in China. *Science* (80-. ). eabb6105 (2020)  
316 doi:10.1126/science.abb6105.



- 317 7. Cowling, B. J. *et al.* Impact assessment of non-pharmaceutical interventions against  
318 coronavirus disease 2019 and influenza in Hong Kong: an observational study. *Lancet*  
319 *Public Heal.* (2020) doi:10.1016/S2468-2667(20)30090-6.
- 320 8. Zhao, S. *et al.* Preliminary estimation of the basic reproduction number of novel  
321 coronavirus (2019-nCoV) in China, from 2019 to 2020: A data-driven analysis in the early  
322 phase of the outbreak. *Int. J. Infect. Dis.* **92**, 214–217 (2020).
- 323 9. Kraemer, M. U. G. *et al.* The effect of human mobility and control measures on the  
324 COVID-19 epidemic in China. *Science* (80-. ). eabb4218 (2020)  
325 doi:10.1126/science.abb4218.
- 326 10. Chinazzi, M. *et al.* The effect of travel restrictions on the spread of the 2019 novel  
327 coronavirus (COVID-19) outbreak. *Science* (2020) doi:10.1126/science.aba9757.
- 328 11. Du, Z. *et al.* Risk for Transportation of 2019 Novel Coronavirus Disease from Wuhan to  
329 Other Cities in China. *Emerg. Infect. Dis.* **26**, (2020).
- 330 12. Zhang, J. *et al.* Evolving epidemiology and transmission dynamics of coronavirus disease  
331 2019 outside Hubei province, China: a descriptive and modelling study. *Lancet Infect.*  
332 *Dis.* **3099**, 1–10 (2020).
- 333 13. Kucharski, A. J. *et al.* Articles Early dynamics of transmission and control of COVID-19:  
334 a mathematical modelling study. *Lancet Infect. Dis.* (2020) doi:10.1016/S1473-  
335 3099(20)30144-4.
- 336 14. Lin, Q. *et al.* A conceptual model for the coronavirus disease 2019 (COVID-19) outbreak  
337 in Wuhan, China with individual reaction and governmental action. *Int. J. Infect. Dis.* **93**,  
338 211–216 (2020).

- 339 15. The State Council\_The People's Republic of China. [http://www.gov.cn/xinwen/2020-](http://www.gov.cn/xinwen/2020-01/23/content_5471751.htm)  
340 01/23/content\_5471751.htm.
- 341 16. Health Commission of Hubei Province.  
342 [http://wjw.hubei.gov.cn/bmdt/ztl/fkxxgzbdgrfyyq/xxfb/202002/t20200213\\_2025580.sht](http://wjw.hubei.gov.cn/bmdt/ztl/fkxxgzbdgrfyyq/xxfb/202002/t20200213_2025580.shtm)  
343 ml.
- 344 17. Li, R. *et al.* Substantial undocumented infection facilitates the rapid dissemination of  
345 novel coronavirus (SARS-CoV2). *Science* (80-. ). eabb3221 (2020)  
346 doi:10.1126/science.abb3221.
- 347 18. SFDA Approves New Coronavirus Nucleic Acid Detection Reagent\_Chinese government  
348 website. [http://www.gov.cn/xinwen/2020-01/27/content\\_5472368.htm](http://www.gov.cn/xinwen/2020-01/27/content_5472368.htm).
- 349 19. Bai, Y. *et al.* Presumed Asymptomatic Carrier Transmission of COVID-19. *JAMA* (2020)  
350 doi:10.1001/jama.2020.2565.
- 351 20. Rothe, C. *et al.* Transmission of 2019-nCoV Infection from an Asymptomatic Contact in  
352 Germany. *N. Engl. J. Med.* (2020) doi:10.1056/nejmc2001468.
- 353 21. Tian, H. *et al.* Early evaluation of the Wuhan City travel restrictions in response to the  
354 2019 novel coronavirus outbreak. *medRxiv* 2020.01.30.20019844 (2020)  
355 doi:10.1101/2020.01.30.20019844.
- 356 22. Tang, B. *et al.* An updated estimation of the risk of transmission of the novel coronavirus  
357 (2019-nCov). *Infect. Dis. Model.* **5**, 248–255 (2020).
- 358 23. Wuhan Municipal Health Commission.  
359 [http://wjw.wuhan.gov.cn/ztl\\_28/fk/yqtb/index.shtml](http://wjw.wuhan.gov.cn/ztl_28/fk/yqtb/index.shtml).

- 360 24. National Health Commission of the People's Republic of China.  
361 [http://www.nhc.gov.cn/xcs/xxgzbd/gzbd\\_index.shtml](http://www.nhc.gov.cn/xcs/xxgzbd/gzbd_index.shtml).
- 362 25. Zou, L. *et al.* SARS-CoV-2 viral load in upper respiratory specimens of infected patients.  
363 *New England Journal of Medicine* vol. 382 1177–1179 (2020).
- 364 26. The State Council Of The People's Republic Of China, Policy and regulatory documents;  
365 [http://www.gov.cn/xinwen/2020-01/24/content\\_5472017.htm](http://www.gov.cn/xinwen/2020-01/24/content_5472017.htm).
- 366 27. Tsang, T. K. *et al.* Effect of changing case definitions for COVID-19 on the epidemic  
367 curve and transmission parameters in mainland China: a modelling study. *Lancet Public*  
368 *Heal.* (2020) doi:10.1016/S2468-2667(20)30089-X.
- 369 28. Diekmann, O., Heesterbeek, J. A. P. & Roberts, M. G. The construction of next-  
370 generation matrices for compartmental epidemic models. *J. R. Soc. Interface* **7**, 873–885  
371 (2010).
- 372 29. Endo, A., van Leeuwen, E. & Baguelin, M. Introduction to particle Markov-chain Monte  
373 Carlo for disease dynamics modellers. *Epidemics* **29**, 100363 (2019).
- 374 30. NIMBLE – An R package for programming with BUGS models and compiling parts of R.  
375 <https://r-nimble.org/>.
- 376 31. Zhang, J. *et al.* Changes in contact patterns shape the dynamics of the COVID-19  
377 outbreak in China. *Science (80-. )*. eabb8001 (2020) doi:10.1126/science.abb8001.
- 378 32. Park, S. W. *et al.* Reconciling early-outbreak estimates of the basic reproductive number  
379 and its uncertainty: framework and applications to the novel coronavirus (SARS-CoV-2)  
380 outbreak. doi:10.1101/2020.01.30.20019877.

- 381 33. Qian, M. *et al.* Psychological responses, behavioral changes and public perceptions during  
382 the early phase of the COVID-19 outbreak in China: a population based cross-sectional  
383 survey. *medRxiv* 2020.02.18.20024448 (2020) doi:10.1101/2020.02.18.20024448.
- 384 34. Backer, J. A., Klinkenberg, D. & Wallinga, J. Incubation period of 2019 novel  
385 coronavirus (2019-nCoV) infections among travellers from Wuhan, China, 20–28 January  
386 2020. *Eurosurveillance* **25**, 2000062 (2020).
- 387 35. Lauer, S. A. *et al.* The Incubation Period of Coronavirus Disease 2019 (COVID-19) From  
388 Publicly Reported Confirmed Cases: Estimation and Application. *Ann. Intern. Med.*  
389 (2020) doi:10.7326/M20-0504.
- 390 36. Jiang, X. *et al.* Is a 14-day quarantine period optimal for effectively controlling  
391 coronavirus disease 2019 (COVID-19)? *medRxiv* 2020.03.15.20036533 (2020)  
392 doi:10.1101/2020.03.15.20036533.
- 393
- 394

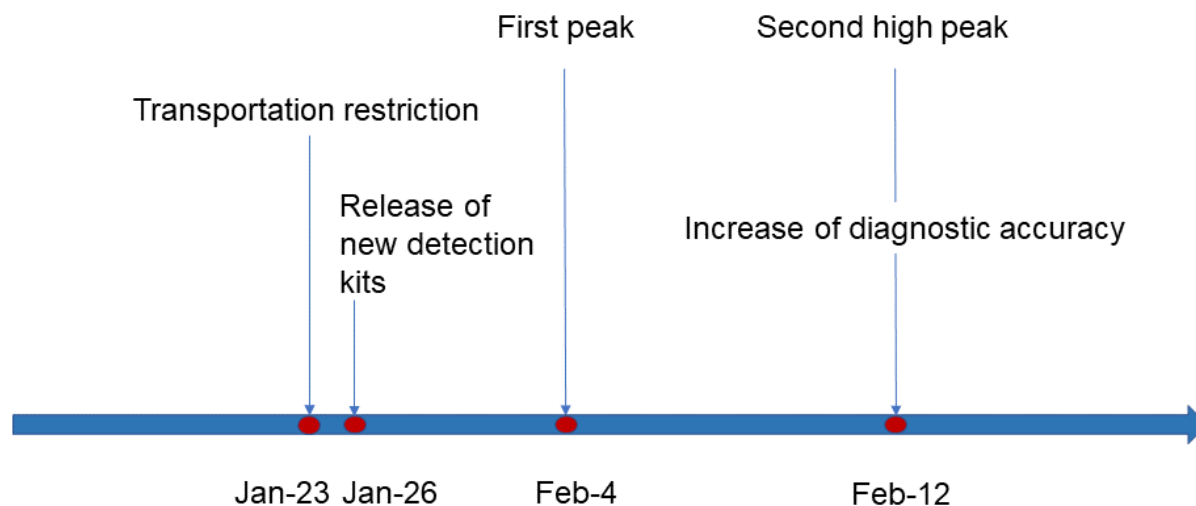

395  
396 Figure 1. The timeline of improved diagnostic capability and intervention measures implemented  
397 in Wuhan, China. New commercial kits were approved by the State Food and Drug Administration  
398 (SFDA) on January 26<sup>18</sup>; Updated diagnostic criteria, COVID-19 case confirmation should rely on  
399 both clinical diagnosis and laboratory diagnosis, was introduced on February 12<sup>16</sup>; Wuhan  
400 transportation restrictions were implemented on January 23<sup>15</sup>.

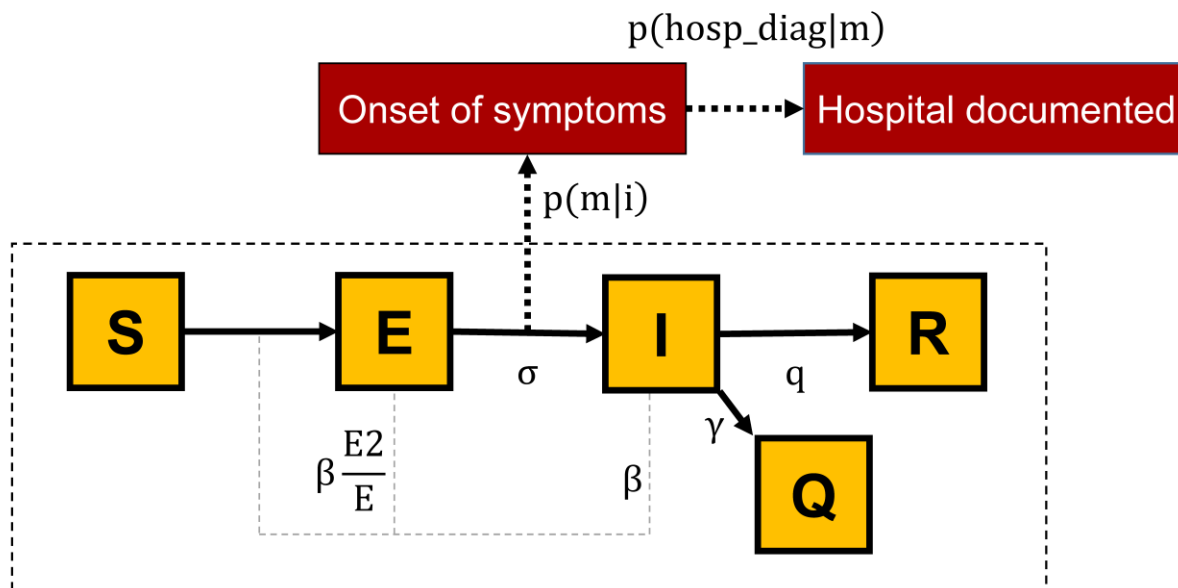

401  
 402 Figure 2: SEIQR model schema. The population is divided into five compartments:  
 403 S (susceptible), E (exposed), I (symptomatically infectious), Q (quarantined), and R (recovered).  
 404 E2 is the number of exposed individuals after latent period who are pre-asymptomatically  
 405 infectious,  $\beta$  is the transmission rate,  $\sigma$  is the incubation rate,  $q$  is the quarantine rate,  $\gamma$  is the  
 406 recovery rate. A fraction of newly symptomatic infections seek for medical care and are  
 407 eventually documented by hospitals, where  $p(m|i)$  is the probability of a symptomatic infectious  
 408 case seeks medical care,  $p(\text{hosp\_diag}|m)_t$  represents the probability that a symptomatic  
 409 infectious outpatient is diagnosed as COVID-19 case by the hospital.

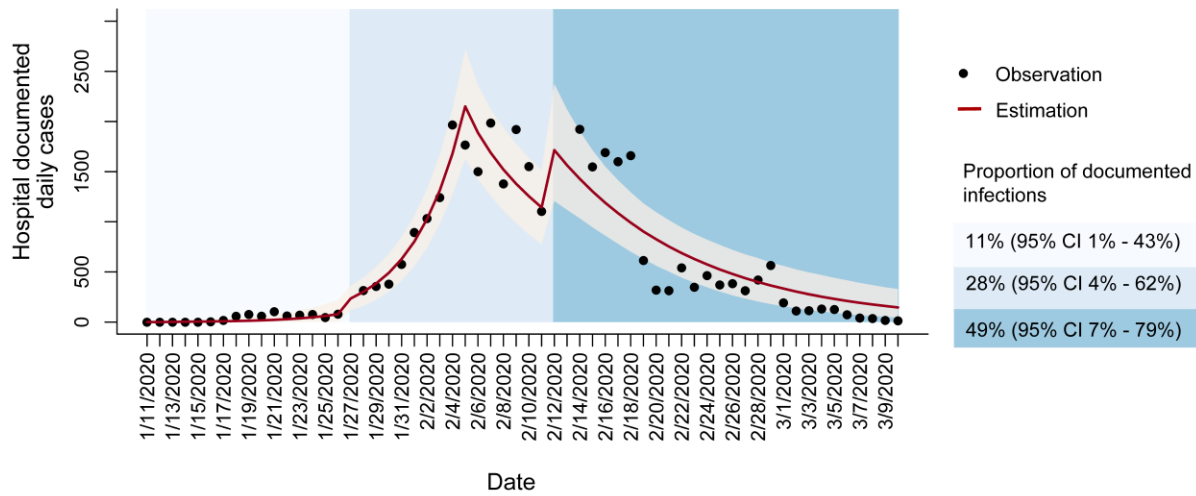

410  
 411 Figure 3. Number of daily hospital documented cases in Wuhan. The red lines represent model-  
 412 estimated cases, grey shadow represents the 95% prediction interval, black points represent the  
 413 observed documented cases, blue shaded background denotes incrementally increasing  
 414 proportions of new documented infections out of total new infections in the corresponding period.

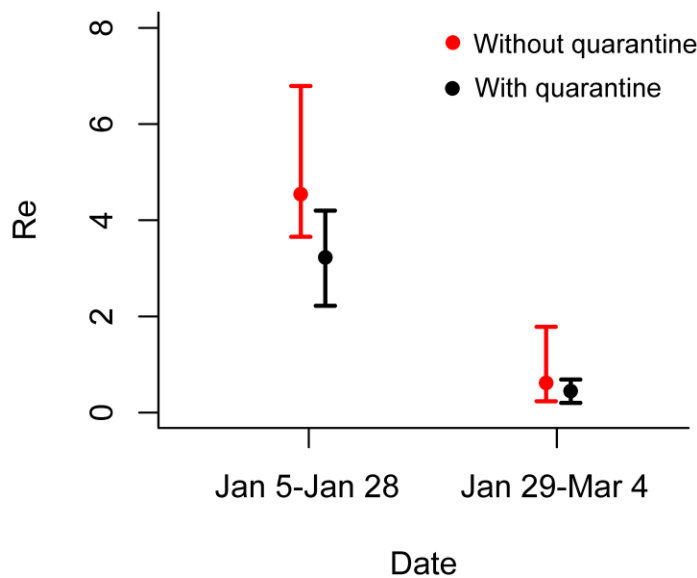

415  
 416 Figure 4. Estimation of the effective reproductive number  $R_e$  in Wuhan. The red point represents  
 417 the estimated  $R_e$  when quarantine measures were not implemented, the black point represents  $R_e$

418 when quarantine measures were implemented, and whiskers show the 95% credible intervals.

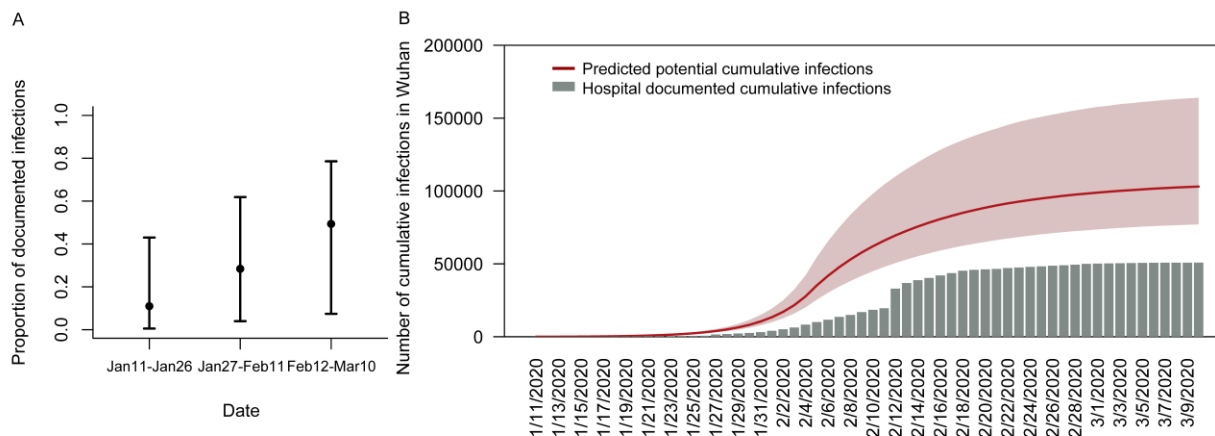

419

420 Figure 5. The prediction of temporal diagnostic capability and potential cumulative infections in  
421 Wuhan. (A) The estimated proportion of new documented infections out of total new onset  
422 infections on different periods with 95% credible intervals. (B) The red line is the predicted  
423 potential total cumulative cases, and the red shadow area represents the 95% prediction interval;  
424 the grey bar is the hospital documented cumulative cases.



425 Table 1. Parameter estimates of the SEIQR epidemic model. The definitions of the parameters  
 426 are described. The mean value and 95% credible interval of the posterior distribution of each of  
 427 the parameters are included. Convergence is diagnosed to have occurred when the value of  
 428 Gelman-Rubin convergence is close to 1 or the ESS is larger than 200.

| Parameters                 | Definition                                                  | Mean  | 95% CI         | Gelman-Rubin convergence | ESS    |
|----------------------------|-------------------------------------------------------------|-------|----------------|--------------------------|--------|
| $1/\sigma$                 | Incubation period (days)                                    | 5.68  | (2.46, 8.03)   | 1.006                    | 261.56 |
| $\eta$                     | Latent period (days)                                        | 2.82  | (1.10, 5.40)   | 1.005                    | 309.46 |
| $1/q$                      | Time between symptom onset and quarantine start (days)      | 5.44  | (1.99, 9.76)   | 1.003                    | 477.50 |
| $\alpha$                   | Transportation restriction coefficient                      | -1.96 | (-2.90, -1.21) | 1.003                    | 411.77 |
| $\beta_0$                  | Basic transmission rate without transportation restrictions | 0.67  | (0.44, 0.97)   | 1.001                    | 293.01 |
| $p_1(\text{hosp\_diag m})$ | Hospital diagnostic rate from Jan 11 to Jan 26              | 0.14  | (0.01,0.54)    | 1.002                    | 396.84 |
| $p_2(\text{hosp\_diag m})$ | Hospital diagnostic rate from Jan 27 to Feb 11              | 0.35  | (0.05,0.78)    | 1.008                    | 571.52 |
| $p_3(\text{hosp\_diag m})$ | Hospital diagnostic rate from Feb 12 to Mar 10              | 0.61  | (0.09,0.98)    | 1.004                    | 557.22 |

429

430 **Supplementary**

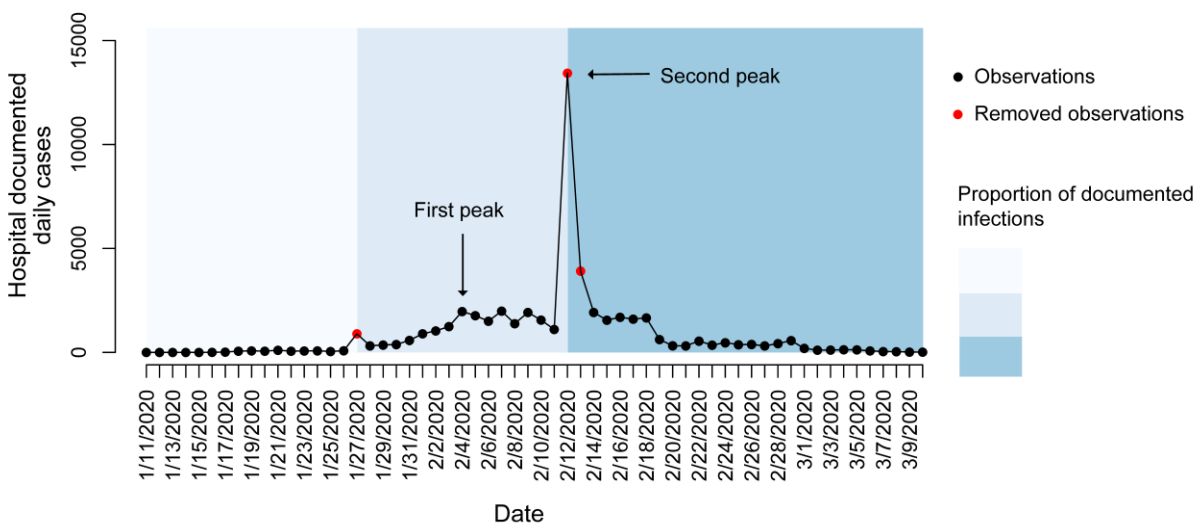

431  
432 Figure S1. The original observed hospital documented daily cases without removing values. The  
433 red points indicate the observed number of cases at the dates when many retrospectively  
434 documented cases were counted. Data in these three days were replaced by smoothing values  
435 because they contain many retrospectively documented cases. The black points indicate the  
436 observed number of cases. Blue shaded background denotes incrementally increasing  
437 proportions of new documented infections out of total new infections on the corresponding  
438 period caused by improved diagnostic rates.

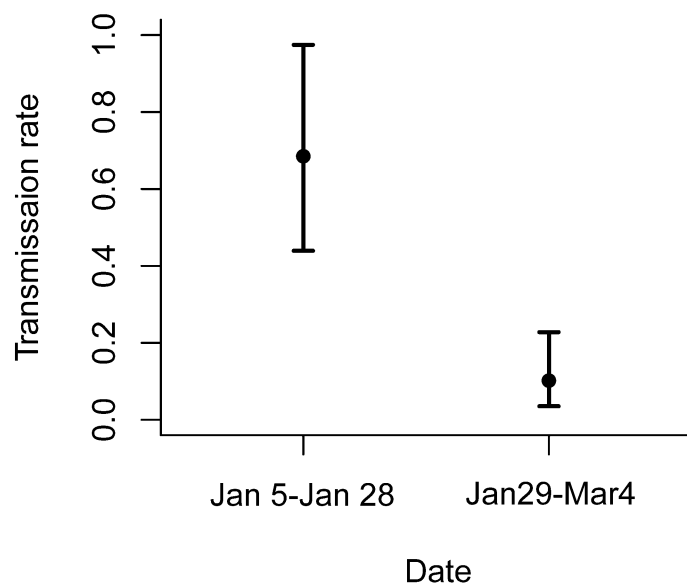

439

440 Figure S2. Estimation of the transmission rate  $\beta_t$  with 95% credible intervals.

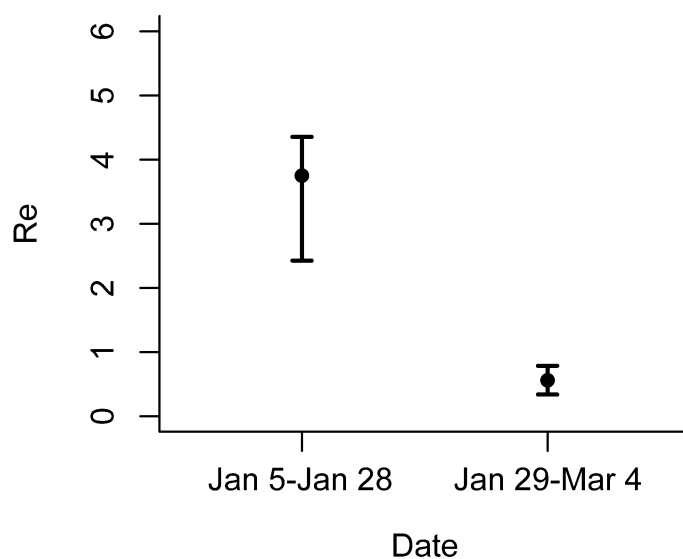

441

442 Figure S3. Estimation of the effective reproductive number  $R_e$  using a fixed hospital diagnostic  
443 rate in Wuhan. The fixed hospital diagnostic rate was assumed to be equal to the estimated mean  
444 value of the original rate (0.14, see in Table 1) when not considering the improvement of  
445 diagnostic capability.  $R_e$  was estimated to be 3.76 (95% CI 2.43 - 4.36) before the transportation

446 restrictions were implemented and to be 0.56 (95% CI 0.34 - 0.79) after the transportation  
447 restrictions were implemented.

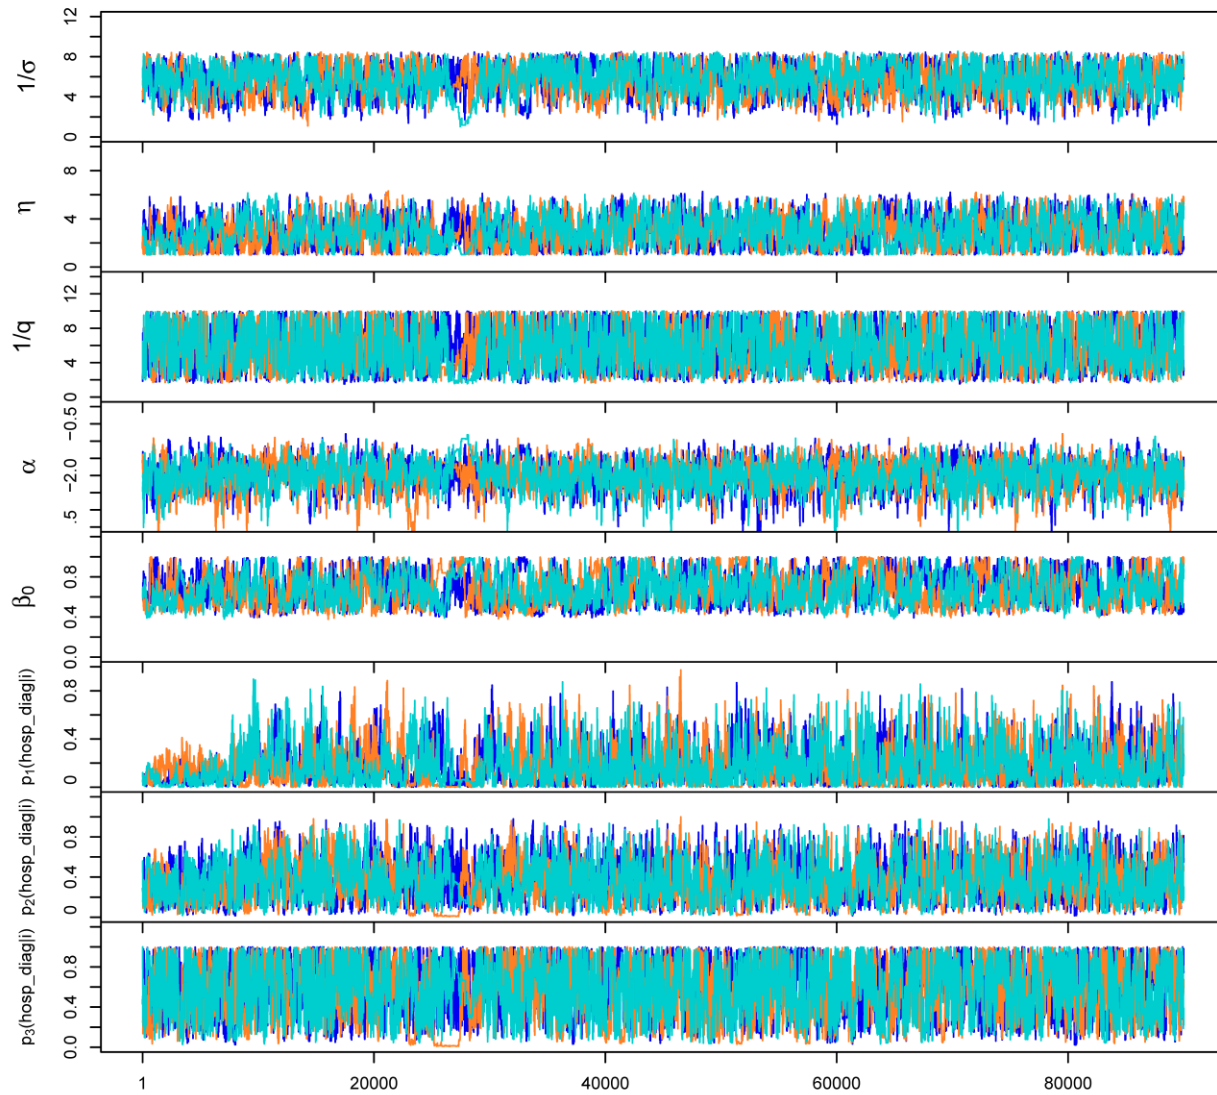

448  
449 Figure S4. Trace plots of parameter values for the model frame. The three different colours  
450 represent three chains.
